# Supplementary material
Source: Elsevier journal article supplement (https://agroparistech.hal.science/hal-03451358v1/file/mmc1.pdf)

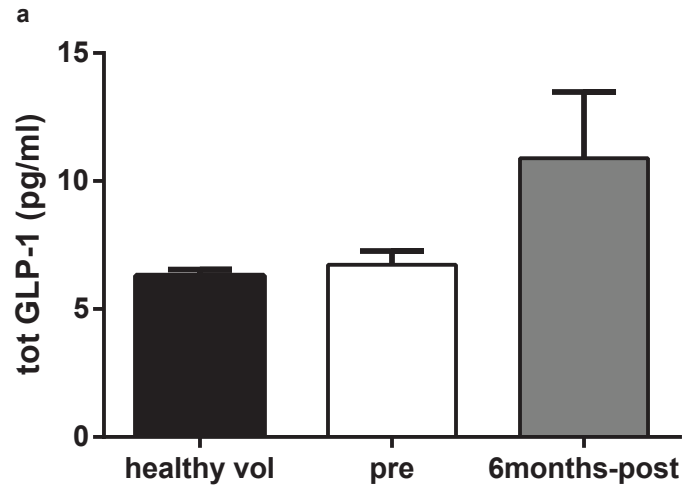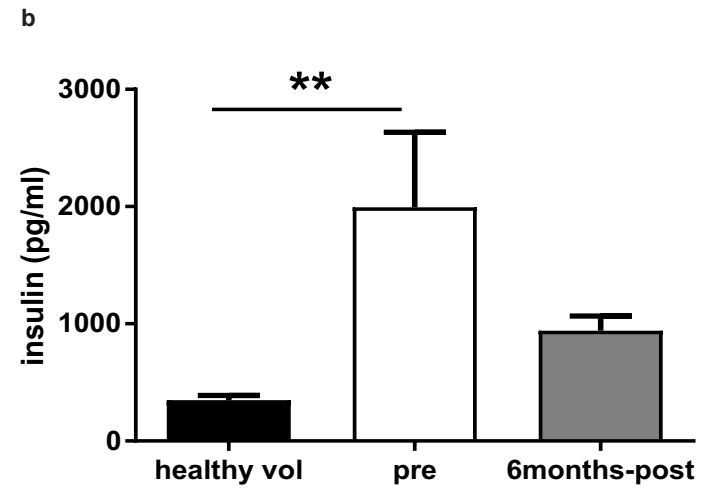

Supplement: mmc1 [file mmc1.pdf]
